# Supplementary material
Source: MDPI journal article supplement (https://www.mdpi.com/1424-8247/16/3/465)
Supplement: s1 [file s1]

# Drug-Utilization, Healthcare Facilities Accesses and Costs of the First Generation of JAK Inhibitors in Rheumatoid Arthritis

Irma Convertino <sup>1</sup>, Valentina Lorenzoni <sup>2</sup>, Rosa Gini <sup>3</sup>, Giuseppe Turchetti <sup>2</sup>, Elisabetta Fini <sup>4</sup>, Sabrina Giometto <sup>5</sup>, Claudia Bartolini <sup>3</sup>, Olga Paoletti <sup>3</sup>, Sara Ferraro <sup>1</sup>, Emiliano Cappello <sup>1</sup>, Giulia Valdiserra <sup>1</sup>, Marco Bonaso <sup>1</sup>, Corrado Blandizzi <sup>1,6</sup>, Marco Tuccori <sup>1,6,\*</sup> and Ersilia Lucenteforte <sup>5</sup>

<sup>1</sup> Unit of Pharmacology and Pharmacovigilance, Department of Clinical and Experimental Medicine, University of Pisa, 56126 Pisa, Italy; convertino.irma@gmail.com (I.C.); saraFerraro.a@gmail.com (S.F.); emilianocappello@gmail.com (E.C.); giuliavaldiserra@gmail.com (G.V.); bonasomarco@gmail.com (M.B.); c.blandizzi@gmail.com (C.B.)

<sup>2</sup> Institute of Management, Scuola Superiore Sant'Anna, 56100 Pisa, Italy; vlorenzoni9@gmail.com (V.L.); giuseppe.turchetti@santannapisa.it (G.T.)

<sup>3</sup> Tuscan Regional Healthcare Agency, 50100 Florence, Italy; rosa.gini@ars.toscana.it (R.G.); claudia.bartolini@ars.toscana.it (C.B.); olga.paoletti@ars.toscana.it (O.P.)

<sup>4</sup> Medical Specialization School of Pharmacology, University of Pisa, 56126 Pisa, Italy; elisabetta.fini7@gmail.com

<sup>5</sup> Unit of Medical Statistics, Department of Clinical and Experimental Medicine, University of Pisa, 56126 Pisa, Italy; sabrina.giometto@gmail.com (S.G.); ersilia.lucenteforte@unipi.it (E.L.)

<sup>6</sup> Unit of Adverse Drug Reactions Monitoring, University Hospital of Pisa, 56126 Pisa, Italy

\* Correspondence: m.tuccori@ao-pisa.toscana.it or marco.tuccori@gmail.com; Tel.: +39-050-2218761; Fax: +39-050-992071

Supplementary Material (SM) Figures and Tables

Figure S1. First cohort

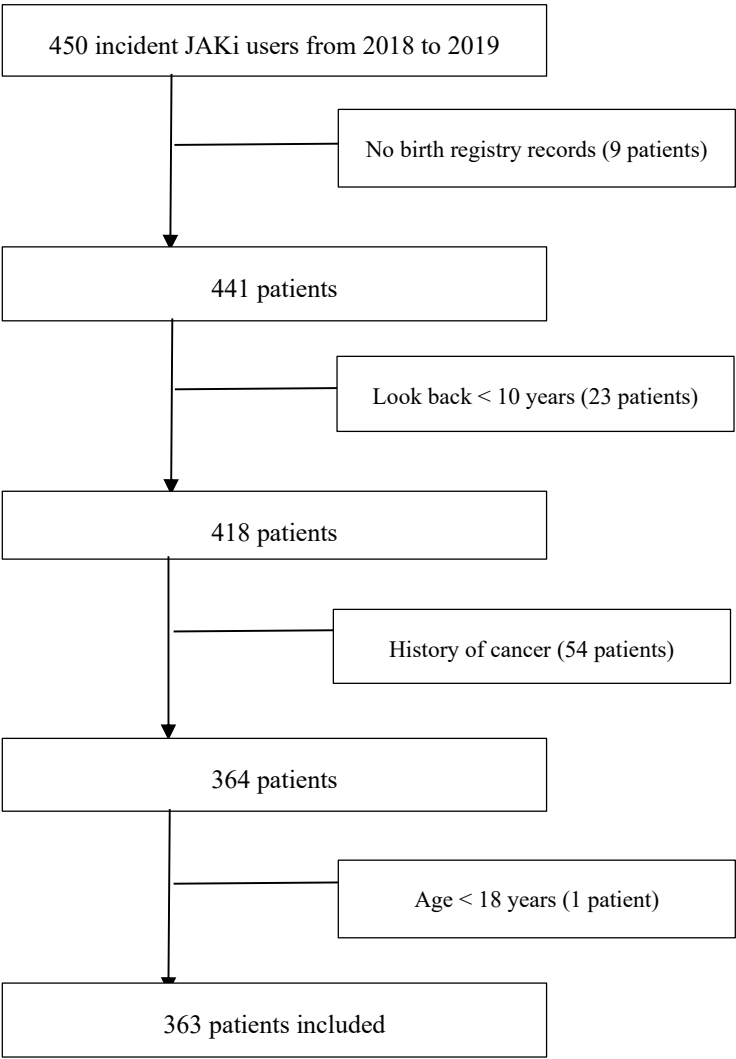

**Table S1.** DMARDs use history in incident JAKi users

| <b>DMARDs</b>                | <b>Patients, n (%)</b><br><b>(n = 363)</b> |
|------------------------------|--------------------------------------------|
| No use                       | 29 (8.0)                                   |
| Any use                      | 334 (92.0)                                 |
| <b>csDMARDs</b>              | 287 (79.1)                                 |
| Methotrexate (L01BA01)       | 152 (41.9)                                 |
| Leflunomide (L04AA13)        | 121 (33.3)                                 |
| Azathioprine (L04AX01)       | 10 (2.8)                                   |
| Cyclosporin (L04AD01)        | 15 (4.1)                                   |
| Hydroxychloroquine (P01BA02) | 161 (44.4)                                 |
| Minocycline (A01AB23)        | 0 (0.0)                                    |
| Mycophenolate (L04AA06)      | 2 (0.6)                                    |
| Sulfasalazine (A07EC01)      | 39 (10.7)                                  |
| <b>anti-TNF bDMARDs</b>      | 217 (59.8)                                 |
| Adalimumab (L04AB04)         | 97 (26.7)                                  |
| Certolizumabpegol (L04AB05)  | 60 (16.5)                                  |
| Etanercept (L04AB01)         | 147 (40.5)                                 |
| Golimumab (L04AB06)          | 42 (11.6)                                  |
| Infliximab (L04AB02)         | 28 (7.7)                                   |
| <b>MOA bDMARDs</b>           | 152 (41.9)                                 |
| Abatacept (L04AA24)          | 110 (30.3)                                 |
| Rituximab (L01XC02)          | 34 (9.4)                                   |
| Tocilizumab (L04AC07)        | 74 (20.4)                                  |
| Sarilumab (L04AC14)          | 0 (0.0)                                    |

bDMARDs: biologic DMARDs; csDMARDs: conventional synthetic DMARDs; DMARDs: disease modifying anti-rheumatic drugs; JAKi: Janus Kinase inhibitor; MOA: alternative mechanism of action from TNF inhibitor; TNF: tumor necrosis factor

**Table S2.** History of DMARDs dispensations

| DMARD                                                     | Overall<br>dispensation, n | Dispensation per<br>patients, mean (SD) | Dispensations groups, n (%) |         |         |
|-----------------------------------------------------------|----------------------------|-----------------------------------------|-----------------------------|---------|---------|
|                                                           |                            |                                         | 1-3                         | 4-9     | ≥10     |
| <i>Conventional sysntheticDMARDs (csDMARDs) (n* =500)</i> |                            |                                         |                             |         |         |
| Methotrexate (n = 152)                                    | 3451                       | 22.7 (23.6)                             | 33(22)                      | 26 (17) | 93 (61) |
| Leflunomide (n = 121)                                     | 2261                       | 18.7 (22.0)                             | 33 (27)                     | 32 (27) | 56 (46) |
| Azathioprine (n = 10)                                     | 172                        | 17.2 (16.5)                             | 3 (30)                      | 1 (10)  | 6 (60)  |
| Cyclosporin (n =15)                                       | 102                        | 6.8 (9.9)                               | 7 (47)                      | 6 (40)  | 2 (13)  |
| Hydroxychloroquine (n =161)                               | 2398                       | 14.9 (17.8)                             | 54 (33)                     | 30 (19) | 77 (48) |
| Minocycline (n = 0)                                       | 0                          | 0 (0.0)                                 | 0                           | 0       | 0       |
| Mycophenolate (n = 2)                                     | 14                         | 7.0 (7.1)                               | 1 (50)                      | 0 (0)   | 1 (50)  |
| Sulfasalazine (n = 39)                                    | 252                        | 6.5 (8.7)                               | 23 (59)                     | 6 (15)  | 10 (26) |
| <i>Anti-TNF biologic DMARDs (n =374)</i>                  |                            |                                         |                             |         |         |
| Adalimumab (n = 97)                                       | 1589                       | 16.4 (20.1)                             | 18 (19)                     | 31 (32) | 48 (49) |
| Certolizumabpegol (n = 60)                                | 893                        | 14.9 (17.7)                             | 16 (27)                     | 21 (35) | 23 (38) |
| Etanercept (n = 147)                                      | 3762                       | 25.6 (30.0)                             | 26 (18)                     | 36 (24) | 85 (58) |
| Golimumab (n = 42)                                        | 512                        | 12.2 (13.6)                             | 8 (19)                      | 18 (43) | 16 (38) |
| Infliximab (n =28)                                        | 306                        | 10.9 (14.9)                             | 11 (39)                     | 10 (36) | 7 (25)  |
| <i>MOA biologic DMARDs (n =218)</i>                       |                            |                                         |                             |         |         |
| Abatacept (n = 110)                                       | 1843                       | 16.8 (18.2)                             | 29 (26)                     | 28 (26) | 53 (48) |
| Rituximab (n = 34)                                        | 234                        | 6.9 (6.4)                               | 14 (41)                     | 11 (32) | 9 (27)  |
| Tocilizumab (n =74)                                       | 1734                       | 23.4 (30.7)                             | 7 (9)                       | 26 (35) | 41 (56) |
| Sarilumab (n = 0)                                         | 0                          | 0 (0.0)                                 | 0                           | 0       | 0       |

bDMARDs: biologic DMARDs; csDMARDs: conventional synthetic DMARDs; DMARDs: disease modifying anti-rheumatic drugs; JAKi: Janus Kinase inhibitor; MOA: alternative mechanism of action from TNF inhibitor; n: number; SD: standard deviation; TNF: tumor necrosis factor

\* number of patients with at least a dispensation

**Table S3.** Distribution of DMARD and bDMARD users among patients receiving the first JAKi stratified for time periods

| Time periods   | Patients with first DMARD, n, (%) | Patients with first bDMARD, n (%) |
|----------------|-----------------------------------|-----------------------------------|
|                | <b>n=334</b>                      | <b>n =253</b>                     |
| < 1 year       | 20 (6)                            | 47 (19)                           |
| 1 ≤ years < 2  | 20 (6)                            | 26 (10)                           |
| 2 ≤ years < 3  | 24 (7)                            | 29 (11)                           |
| 3 ≤ years < 5  | 26 (8)                            | 41 (16)                           |
| 5 ≤ years < 10 | 244 (73)                          | 110 (44)                          |

DMARDs: disease modifying anti-rheumatic drugs; bDMARD: biologic DMARD; DMARDs: disease modifying anti-rheumatic drugs; JAKi: Janus Kinase inhibitor; n: number

**Figure S2.** Second cohort

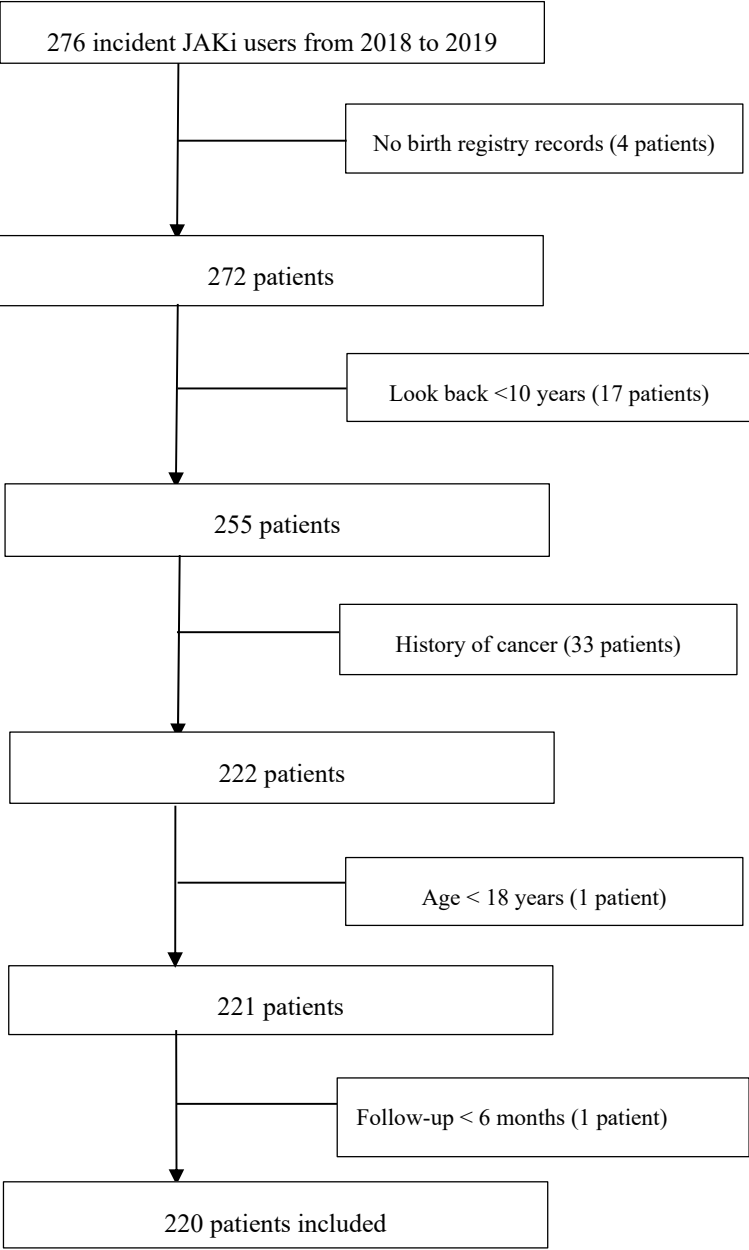

|                      | Overall (n) | Baricitinib (n) | Tofacitinib (n) |
|----------------------|-------------|-----------------|-----------------|
| Users                | 220         | 178             | 42              |
| ED admissions (n)    | 109         | 68              | 41              |
| Hospitalizations (n) | 39          | 28              | 11              |
| RA visits (n)        | 64          | 64              | 0               |

ED: emergency department; n: number; RA: rheumatoid arthritis

**Table S4.** Distribution of healthcare services assessed in the follow-up

**Table S5.** Diagnoses associated with the ED admissions in the follow up

| Description                                                                                        | ICD-9 code | Cases, n (%) |
|----------------------------------------------------------------------------------------------------|------------|--------------|
| Injury and poisoning                                                                               | 800-999    | 20 (18.3)    |
| Diseases of the skin and subcutaneous tissue                                                       | 680-709    | 15 (13.8)    |
| Diseases of the circulatory system                                                                 | 390-459    | 12 (11.0)    |
| Symptoms, signs, and ill-defined conditions                                                        | 780-799    | 10 (9.2)     |
| Diseases of the nervous system and sense organs                                                    | 320-389    | 10 (9.2)     |
| Diseases of the digestive system                                                                   | 520-579    | 8 (7.3)      |
| Diseases of the musculoskeletal system and connective tissue                                       | 710-739    | 7 (6.4)      |
| Diseases of the respiratory system                                                                 | 460-519    | 5 (4.6)      |
| Diseases of the genitourinary system                                                               | 580-629    | 3 (2.8)      |
| Supplementary classification of factors influencing health status and contact with health services | V01-V91    | 2 (1.8)      |
| Infectious and parasitic diseases                                                                  | 001-139    | 2 (1.8)      |
| Mental disorders                                                                                   | 290-319    | 1 (0.9)      |
| Complications of pregnancy, childbirth, and the puerperium                                         | 630-679    | 1 (0.9)      |
| Diseases of the blood and blood-forming organs                                                     | 280-289    | 1 (0.9)      |
| Endocrine, nutritional and metabolic diseases, and immunity disorders                              | 240-279    | 1 (0.9)      |

JAKi: Janus Kinase inhibitor ED: emergency department

**Table S6.** Diagnoses associated with hospitalizations in the follow up

| Description                                                                                        | ICD-9 code | Cases, n (%) |
|----------------------------------------------------------------------------------------------------|------------|--------------|
| Diseases of the circulatory system                                                                 | 390-459    | 27 (69.2)    |
| Diseases of the musculoskeletal system and connective tissue                                       | 710-739    | 25 (64.1)    |
| Diseases of the skin and subcutaneous tissue                                                       | 680-709    | 15 (38.5)    |
| Diseases of the respiratory system                                                                 | 460-519    | 13 (33.3)    |
| Diseases of the nervous system and sense organs                                                    | 320-389    | 10 (25.6)    |
| Endocrine, nutritional and metabolic diseases, and immunity disorders                              | 240-279    | 8 (20.5)     |
| Supplementary classification of factors influencing health status and contact with health services | V01-V91    | 6 (15.4)     |
| Diseases of the genitourinary system                                                               | 580-629    | 5 (12.8)     |
| Infectious and parasitic diseases                                                                  | 001-139    | 5 (12.8)     |
| Diseases of the blood and blood-forming organs                                                     | 280-289    | 5 (12.8)     |
| Diseases of the digestive system                                                                   | 520-579    | 2 (5.1)      |
| Mental disorders                                                                                   | 290-319    | 2 (5.1)      |
| Neoplasms                                                                                          | 140-239    | 2 (5.1)      |

JAKi: Janus Kinase inhibitor

**Table S7.** Direct healthcare costs for the JAKi use in the follow up

|                                        | Cost (€)                      |
|----------------------------------------|-------------------------------|
| <b>Total cost*</b>                     | <b>1,054,530</b>              |
| Drugs                                  | 887,946                       |
| Hospitalization                        | 165,624                       |
| RA visits                              | 960                           |
| <b>Mean (Min;Max) cost per patient</b> | <b>4,793.3 (607.5;50,306)</b> |
| Drugs                                  | 4,036.1 (607.5;8,387.9)       |
| Hospitalization                        | 752.8 (0;43,811)              |
| RA visits                              | 4.4 (0;60)                    |

\* Costs of ED accesses are not included; RA: rheumatoid arthritis

**Table S8.**Study drugs

| Drug class                                     | Drug name          | ATC code |
|------------------------------------------------|--------------------|----------|
| Targeted synthetic DMARDs<br>(tsDMARDs) – JAKi | Tofacitinib        | L04AA29  |
|                                                | Baricitinib        | L04AA37  |
| Conventional synthetic DMARDs<br>(csDMARDs)    | Methotrexate       | L01BA01  |
|                                                | Leflunomide        | L04AA13  |
|                                                | Azathioprine       | L04AX01  |
|                                                | Cyclosporin        | L04AD01  |
|                                                | Hydroxychloroquine | P01BA02  |
|                                                | Minocycline        | A01AB23  |
|                                                | Mycophenolate      | L04AA06  |
|                                                | Sulfasalazine      | A07EC01  |
| Anti-TNF biologic DMARDs<br>(bDMARDs)          | Adalimumab         | L04AB04  |
|                                                | Certolizumabpegol  | L04AB05  |
|                                                | Etanercept         | L04AB01  |
|                                                | Golimumab          | L04AB06  |
|                                                | Infliximab         | L04AB02  |
| MOA biologic DMARDs<br>(bDMARDs)               | Abatacept          | L04AA24  |
|                                                | Rituximab          | L01XC02  |
|                                                | Tocilizumab        | L04AC07  |
|                                                | Sarilumab          | L04AC14  |

ATC: anatomical therapeutic chemical classification; DMARDs: disease modifying anti-rheumatic drugs; JAKi: Janus Kinase inhibitor; MOA: alternative mechanism of action from TNF inhibitor; TNF: tumor necrosis factor
